# Supplementary material
Source: PubMed Central journal article supplement (PMC4910586)
Supplement: jcav07p0935s1.pdf [file jcav07p0935s1.pdf]

**Supplement materials**

Table 1. Data of clinical patients

| No. | sex <sup>a</sup> | Age(years) | Diagnosis <sup>b</sup>                        | AFP concentration(ng/ml) <sup>c</sup> | metastasis <sup>d</sup> |
|-----|------------------|------------|-----------------------------------------------|---------------------------------------|-------------------------|
| 1   | M                | 36         | liver trauma                                  | 9.8                                   | N                       |
| 2   | F                | 54         | liver trauma                                  | 12.7                                  | N                       |
| 3   | M                | 48         | liver trauma                                  | 14.6                                  | N                       |
| 4   | M                | 52         | liver trauma                                  | 6.8                                   | N                       |
| 5   | F                | 33         | liver trauma                                  | 21.7                                  | N                       |
| 6   | M                | 69         | liver trauma                                  | 23.5                                  | N                       |
| 7   | M                | 49         | HBV-<br>related<br>hepatitis<br>liver tissues | 79.6                                  | N                       |
| 8   | F                | 36         | HBV-<br>related<br>hepatitis<br>liver tissues | 36.7                                  | N                       |
| 9   | M                | 45         | HBV-<br>related<br>hepatitis<br>liver tissues | 109.6                                 | N                       |
| 10  | M                | 57         | HBV-<br>related<br>hepatitis<br>liver tissues | 26.9                                  | N                       |
| 11  | F                | 38         | HBV-<br>related<br>hepatitis<br>liver tissues | 28.8                                  | N                       |
| 12  | M                | 56         | HBV-<br>related<br>hepatitis<br>liver tissues | 58.9                                  | N                       |
| 13  | F                | 68         | HBV-<br>related<br>hepatitis<br>liver tissues | 98.7                                  | N                       |
| 14  | M                | 61         | HBV-<br>related<br>hepatitis<br>liver tissues | 38.9                                  | N                       |
| 15  | M                | 59         | HBV-<br>related<br>hepatitis<br>liver tissues | 89.7                                  | N                       |
| 16  | F                | 47         | HCC                                           | 101.8                                 | N                       |
| 17  | M                | 63         | HCC                                           | 93.6                                  | N                       |
| 18  | M                | 72         | HCC                                           | 82.8                                  | N                       |
| 19  | F                | 56         | HCC                                           | 112.9                                 | N                       |
| 20  | M                | 41         | HCC                                           | 116.8                                 | N                       |
| 21  | M                | 46         | HCC                                           | 198.6                                 | N                       |
| 22  | M                | 38         | HCC                                           | 60.5                                  | N                       |
| 23  | F                | 53         | HCC                                           | 198.6                                 | N                       |

|    |   |    |     |        |              |       |
|----|---|----|-----|--------|--------------|-------|
| 24 | F | 71 | HCC | 439.5  | N            |       |
| 25 | M | 65 | HCC | 336.2  | N            |       |
| 26 | M | 53 | HCC | 421.2  | N            |       |
| 27 | F | 47 | HCC | 365.2  | N            |       |
| 28 | M | 56 | HCC | 278.6  | N            |       |
| 29 | F | 37 | HCC | 156.3  | N            |       |
| 30 | M | 31 | HCC | 299.6  | N            |       |
| 31 | M | 48 | HCC | 338.3  | N            |       |
| 32 | M | 63 | HCC | 926.6  | intrahepatic | and   |
|    |   |    |     |        | lymph nodes  |       |
| 33 | M | 43 | HCC | 322.5  | intrahepatic | and   |
|    |   |    |     |        | lymph nodes  |       |
| 34 | M | 59 | HCC | 443.2  | intrahepatic | and   |
|    |   |    |     |        | lymph nodes  |       |
| 35 | F | 51 | HCC | 265.9  | intrahepatic | and   |
|    |   |    |     |        | lymph nodes  |       |
| 36 | M | 62 | HCC | 487.7  | intrahepatic | and   |
|    |   |    |     |        | lymph nodes  |       |
| 37 | M | 77 | HCC | 589.6  | intrahepatic | and   |
|    |   |    |     |        | lymph nodes  |       |
| 38 | M | 65 | HCC | 448.8  | intrahepatic | and   |
|    |   |    |     |        | lymph nodes  |       |
| 39 | F | 48 | HCC | 392.5  | intrahepatic | and   |
|    |   |    |     |        | lymph nodes  |       |
| 40 | M | 39 | HCC | 405.6  | intrahepatic | and   |
|    |   |    |     |        | lymph nodes  |       |
| 41 | M | 41 | HCC | 535.8  | intrahepatic | and   |
|    |   |    |     |        | lymph nodes  |       |
| 42 | M | 46 | HCC | 667.4  | intrahepatic | and   |
|    |   |    |     |        | lymph nodes  |       |
| 43 | F | 53 | HCC | 431.7  | intrahepatic | and   |
|    |   |    |     |        | lymph nodes  |       |
| 44 | M | 58 | HCC | 547.4  | intrahepatic | and   |
|    |   |    |     |        | lymph nodes  |       |
| 45 | M | 47 | HCC | 483.3  | intrahepatic | and   |
|    |   |    |     |        | lymph nodes  |       |
| 46 | F | 50 | HCC | 569.5  | intrahepatic | and   |
|    |   |    |     |        | lymph nodes  |       |
| 47 | M | 49 | HCC | 793.2  | intrahepatic | and   |
|    |   |    |     |        | lymph nodes  |       |
| 48 | M | 61 | HCC | 689.2  | intrahepatic | and   |
|    |   |    |     |        | lymph        | nodes |
| 49 | M | 64 | HCC | 1125.9 | intrahepatic | and   |
|    |   |    |     |        | lymph nodes  |       |
| 50 | F | 58 | HCC | 886.5  | intrahepatic | and   |
|    |   |    |     |        | lymph        | nodes |
| 51 | M | 36 | HCC | 345.2  | intrahepatic | and   |
|    |   |    |     |        | lymph nodes  |       |
| 52 | M | 48 | HCC | 389.7  | intrahepatic | and   |
|    |   |    |     |        | lymph        | nodes |
| 53 | F | 62 | HCC | 298.7  | intrahepatic | and   |
|    |   |    |     |        | lymph nodes  |       |
| 54 | M | 46 | HCC | 1125.5 | intrahepatic | and   |

|    |   |    |     |       |                              |                    |
|----|---|----|-----|-------|------------------------------|--------------------|
| 55 | M | 66 | HCC | 899.8 | lymph<br>intraphepatic       | nodes<br>and       |
| 56 | F | 58 | HCC | 538.7 | lymph nodes<br>intraphepatic | and<br>lymph nodes |

Note: a, M: man, F: female; b, diagnosis by and pathological tissue section and CT scanned photography; c, serum AFP concentration were detected by enzyme-linked immunosorbent assay(ELISA); d, N: non metastasis.
